# Supplementary material for: The Protection of Polysaccharide from the Brown Seaweed Sargassum graminifolium against Ethylene Glycol-Induced Mitochondrial Damage
Source: MDPI journal article supplement (doi:10.3390/md11030870), 2013-03-13
Supplement: s1 [file s1]

marinedrugs-11-00870-s001.mol
  corina  04161405483D 1   1.00000     0.00000 
CORINA 3.49 0023  12.04.2013
 58 62  0  0  0  0  0  0  0  0999 V2000
    3.0200    1.7182    0.0851 C   0  0  0  0  0  0  0  0  0  0  0  0
    3.0310    0.1863    0.0033 C   0  0  0  0  0  0  0  0  0  0  0  0
    2.1820   -0.3698    1.1464 C   0  0  0  0  0  0  0  0  0  0  0  0
    2.7640    0.1342    2.4729 C   0  0  0  0  0  0  0  0  0  0  0  0
    2.8199    1.6628    2.4633 C   0  0  0  0  0  0  0  0  0  0  0  0
    3.5753    2.1181    1.3360 O   0  0  0  0  0  0  0  0  0  0  0  0
    3.8353    2.2710   -1.0847 C   0  0  0  0  0  0  0  0  0  0  0  0
    3.2885    1.7479   -2.3018 O   0  0  0  0  0  0  0  0  0  0  0  0
    3.2545    0.3215   -2.3677 C   0  0  0  0  0  0  0  0  0  0  0  0
    2.5068   -0.2045   -1.2655 O   0  0  0  0  0  0  0  0  0  0  0  0
    0.1208    4.1068    1.8614 C   0  0  0  0  0  0  0  0  0  0  0  0
    1.4201    3.6082    2.4993 C   0  0  0  0  0  0  0  0  0  0  0  0
    1.4392    4.0063    3.9783 C   0  0  0  0  0  0  0  0  0  0  0  0
    1.2833    5.5261    4.0887 C   0  0  0  0  0  0  0  0  0  0  0  0
   -0.0108    5.9506    3.3894 C   0  0  0  0  0  0  0  0  0  0  0  0
    0.0235    5.5229    2.0263 O   0  0  0  0  0  0  0  0  0  0  0  0
    1.4921    2.1855    2.3868 O   0  0  0  0  0  0  0  0  0  0  0  0
    2.5961   -0.1102   -3.6796 C   0  0  0  0  0  0  0  0  0  0  0  0
    0.8344    0.0856    1.0093 O   0  0  0  0  0  0  0  0  0  0  0  0
    0.3600    3.3643    4.6602 O   0  0  0  0  0  0  0  0  0  0  0  0
    1.2270    5.9016    5.4663 O   0  0  0  0  0  0  0  0  0  0  0  0
   -1.1277    5.3511    4.0490 O   0  0  0  0  0  0  0  0  0  0  0  0
   -3.5622    4.3390    5.2090 C   0  0  0  0  0  0  0  0  0  0  0  0
   -3.4167    4.6474    3.7132 C   0  0  0  0  0  0  0  0  0  0  0  0
   -2.3961    5.7729    3.5438 C   0  0  0  0  0  0  0  0  0  0  0  0
   -2.8849    6.9941    4.3325 C   0  0  0  0  0  0  0  0  0  0  0  0
   -3.1059    6.6075    5.7960 C   0  0  0  0  0  0  0  0  0  0  0  0
   -4.0214    5.5103    5.8797 O   0  0  0  0  0  0  0  0  0  0  0  0
   -1.8579    6.2294    6.3803 O   0  0  0  0  0  0  0  0  0  0  0  0
   -1.9310    5.9561    7.7810 C   0  0  0  0  0  0  0  0  0  0  0  0
   -4.5519    3.1844    5.3707 C   0  0  0  0  0  0  0  0  0  0  0  0
   -4.0842    2.0775    4.5896 O   0  0  0  0  0  0  0  0  0  0  0  0
   -3.9039    2.3688    3.2029 C   0  0  0  0  0  0  0  0  0  0  0  0
   -2.9910    3.4606    3.0440 O   0  0  0  0  0  0  0  0  0  0  0  0
   -3.3458    1.1335    2.4934 C   0  0  0  0  0  0  0  0  0  0  0  0
    4.6620   -0.2148   -2.3180 C   0  0  0  0  0  0  0  0  0  0  0  0
    5.0203   -0.8851   -1.3788 O   0  0  0  0  0  0  0  0  0  0  0  0
    5.5176    0.0523   -3.3172 O   0  0  0  0  0  0  0  0  0  0  0  0
    7.3532   -0.7002   -3.1601 Na  0  0  0  0  0  0  0  0  0  0  0  0
    1.9368   -0.3046    3.5523 O   0  0  0  0  0  0  0  0  0  0  0  0
    2.7039   -0.6403    4.8233 S   0  0  0  0  0  0  0  0  0  0  0  0
    1.7693   -1.2411    5.7093 O   0  0  0  0  0  0  0  0  0  0  0  0
    3.9045   -1.2785    4.4106 O   0  0  0  0  0  0  0  0  0  0  0  0
    3.1157    0.6781    5.4625 O   0  0  0  0  0  0  0  0  0  0  0  0
    1.6258    1.6406    6.3646 Na  0  0  0  0  0  0  0  0  0  0  0  0
    0.1209    3.7707    0.3924 C   0  0  0  0  0  0  0  0  0  0  0  0
    0.2765    4.6446   -0.4273 O   0  0  0  0  0  0  0  0  0  0  0  0
   -0.0519    2.5004   -0.0055 O   0  0  0  0  0  0  0  0  0  0  0  0
   -0.1995    2.1792   -1.9639 Na  0  0  0  0  0  0  0  0  0  0  0  0
   -1.9053    8.0318    4.2576 O   0  0  0  0  0  0  0  0  0  0  0  0
   -2.4924    9.4351    4.2100 S   0  0  0  0  0  0  0  0  0  0  0  0
   -1.4237   10.3225    3.7783 O   0  0  0  0  0  0  0  0  0  0  0  0
   -3.5902    9.3984    3.2562 O   0  0  0  0  0  0  0  0  0  0  0  0
   -2.9489    9.7447    5.5560 O   0  5  0  0  0  0  0  0  0  0  0  0
   -5.2321    2.7350    2.5924 C   0  0  0  0  0  0  0  0  0  0  0  0
   -5.4143    3.8512    2.1671 O   0  0  0  0  0  0  0  0  0  0  0  0
   -6.2127    1.8212    2.5211 O   0  0  0  0  0  0  0  0  0  0  0  0
   -7.9294    2.4006    1.6980 Na  0  0  0  0  0  0  0  0  0  0  0  0
  1  2  1  0      
  2  3  1  0      
  3  4  1  0      
  4  5  1  0      
  5  6  1  0      
  6  1  1  0      
  1  7  1  0      
  7  8  1  0      
  8  9  1  0      
  9 10  1  0      
 10  2  1  0      
 11 12  1  0      
 12 13  1  0      
 13 14  1  0      
 14 15  1  0      
 15 16  1  0      
 16 11  1  0      
  5 17  1  0      
 17 12  1  0      
  9 18  1  0      
  3 19  1  0      
 13 20  1  0      
 14 21  1  0      
 15 22  1  0      
 23 24  1  0      
 24 25  1  0      
 25 26  1  0      
 26 27  1  0      
 27 28  1  0      
 28 23  1  0      
 25 22  1  0      
 27 29  1  0      
 29 30  1  0      
 23 31  1  0      
 31 32  1  0      
 32 33  1  0      
 33 34  1  0      
 34 24  1  0      
 33 35  1  0      
  9 36  1  0      
 36 37  2  0      
 36 38  1  0      
 38 39  1  0      
  4 40  1  0      
 40 41  1  0      
 41 42  2  0      
 41 43  2  0      
 41 44  1  0      
 44 45  1  0      
 11 46  1  0      
 46 47  2  0      
 46 48  1  0      
 48 49  1  0      
 26 50  1  0      
 50 51  1  0      
 51 52  2  0      
 51 53  2  0      
 51 54  1  0      
 33 55  1  0      
 55 56  2  0      
 55 57  1  0      
 57 58  1  0      
M  CHG  1  54  -1
M  STY  1   1 SUP
M  SLB  1   1   1
M  SAL   1  4  36  37  38  39
M  SBL   1  1  40
M  SMT   1 COONa
M  SBV   1 40   -8.5049    5.6172
M  STY  1   2 SUP
M  SLB  1   2   2
M  SAL   2  6  40  41  42  43  44  45
M  SBL   2  1  44
M  SMT   2 OSO3Na
M  SBV   2 44   -7.2204    4.2728
M  STY  1   3 SUP
M  SLB  1   3   3
M  SAL   3  4  46  47  48  49
M  SBL   3  1  50
M  SMT   3 COONa
M  SBV   3 50   -8.6157    6.3319
M  STY  1   4 SUP
M  SLB  1   4   4
M  SAL   4  5  50  51  52  53  54
M  SBL   4  1  54
M  SMT   4 OSO3-
M  SBV   4 54   -7.9892    5.8379
M  STY  1   5 SUP
M  SLB  1   5   5
M  SAL   5  4  55  56  57  58
M  SBL   5  1  59
M  SMT   5 COONa
M  SBV   5 59   -8.5052    5.6176
M  END
$$$$
