# Supplementary material for: The Protection of Polysaccharide from the Brown Seaweed Sargassum graminifolium against Ethylene Glycol-Induced Mitochondrial Damage
Source: MDPI journal article supplement (doi:10.3390/md11030870), 2013-03-13
Supplement: s2 [file s2]

marinedrugs-11-00870-s001.mol
  ChemDraw03251423312D

 58 62  0  0  0  0  0  0  0  0999 V2000
   -2.8381    0.5624    0.0000 C   0  0  0  0  0  0  0  0  0  0  0  0
   -3.4558    0.0155    0.0000 C   0  0  0  0  0  0  0  0  0  0  0  0
   -2.6316   -0.0209    0.0000 C   0  0  0  0  0  0  0  0  0  0  0  0
   -1.9465   -0.4888    0.0000 C   0  0  0  0  0  0  0  0  0  0  0  0
   -1.3287    0.0581    0.0000 C   0  0  0  0  0  0  0  0  0  0  0  0
   -2.1530    0.0945    0.0000 O   0  0  0  0  0  0  0  0  0  0  0  0
   -3.0029    1.3708    0.0000 C   0  0  0  0  0  0  0  0  0  0  0  0
   -3.7854    1.6322    0.0000 O   0  0  0  0  0  0  0  0  0  0  0  0
   -4.4031    1.0853    0.0000 C   0  0  0  0  0  0  0  0  0  0  0  0
   -4.2383    0.2769    0.0000 O   0  0  0  0  0  0  0  0  0  0  0  0
    0.3855   -0.4833    0.0000 C   0  0  0  0  0  0  0  0  0  0  0  0
   -0.1371   -1.1217    0.0000 C   0  0  0  0  0  0  0  0  0  0  0  0
    0.6823   -1.0262    0.0000 C   0  0  0  0  0  0  0  0  0  0  0  0
    1.4332   -1.3790    0.0000 C   0  0  0  0  0  0  0  0  0  0  0  0
    1.9559   -0.7406    0.0000 C   0  0  0  0  0  0  0  0  0  0  0  0
    1.1364   -0.8360    0.0000 O   0  0  0  0  0  0  0  0  0  0  0  0
   -0.9775   -0.7359    0.0000 O   0  0  0  0  0  0  0  0  0  0  0  0
   -5.1175    1.4978    0.0000 C   0  0  0  0  0  0  0  0  0  0  0  0
   -3.3460   -0.4334    0.0000 O   0  0  0  0  0  0  0  0  0  0  0  0
    0.0990   -1.6096    0.0000 O   0  0  0  0  0  0  0  0  0  0  0  0
    1.6468   -2.1759    0.0000 O   0  0  0  0  0  0  0  0  0  0  0  0
    2.1695    0.0563    0.0000 O   0  0  0  0  0  0  0  0  0  0  0  0
    3.1122    1.4419    0.0000 C   0  0  0  0  0  0  0  0  0  0  0  0
    2.5295    0.8580    0.0000 C   0  0  0  0  0  0  0  0  0  0  0  0
    3.3544    0.8725    0.0000 C   0  0  0  0  0  0  0  0  0  0  0  0
    4.0670    0.4477    0.0000 C   0  0  0  0  0  0  0  0  0  0  0  0
    4.6498    1.0316    0.0000 C   0  0  0  0  0  0  0  0  0  0  0  0
    3.8249    1.0172    0.0000 O   0  0  0  0  0  0  0  0  0  0  0  0
    5.3643    0.6191    0.0000 O   0  0  0  0  0  0  0  0  0  0  0  0
    6.1893    0.6191    0.0000 C   0  0  0  0  0  0  0  0  0  0  0  0
    2.8979    2.2386    0.0000 C   0  0  0  0  0  0  0  0  0  0  0  0
    2.1008    2.4513    0.0000 O   0  0  0  0  0  0  0  0  0  0  0  0
    1.5180    1.8673    0.0000 C   0  0  0  0  0  0  0  0  0  0  0  0
    1.7324    1.0707    0.0000 O   0  0  0  0  0  0  0  0  0  0  0  0
    0.8035    2.2798    0.0000 C   0  0  0  0  0  0  0  0  0  0  0  0
   -5.4748    0.4672    0.0000 C   0  0  0  0  0  0  0  0  0  0  0  0
   -6.1893    0.0547    0.0000 O   0  0  0  0  0  0  0  0  0  0  0  0
   -4.7604    0.0547    0.0000 O   0  0  0  0  0  0  0  0  0  0  0  0
   -4.0459    0.4672    0.0000 Na  0  0  0  0  0  0  0  0  0  0  0  0
   -1.7337   -2.4513    0.0000 O   0  0  0  0  0  0  0  0  0  0  0  0
   -2.3171   -1.8679    0.0000 S   0  0  0  0  0  0  0  0  0  0  0  0
   -1.7337   -1.2846    0.0000 O   0  0  0  0  0  0  0  0  0  0  0  0
   -2.9005   -2.4513    0.0000 O   0  0  0  0  0  0  0  0  0  0  0  0
   -2.9005   -1.2846    0.0000 O   0  0  0  0  0  0  0  0  0  0  0  0
   -3.6973   -1.4981    0.0000 Na  0  0  0  0  0  0  0  0  0  0  0  0
   -0.7971   -0.3867    0.0000 C   0  0  0  0  0  0  0  0  0  0  0  0
   -1.5116   -0.7992    0.0000 O   0  0  0  0  0  0  0  0  0  0  0  0
   -0.0826   -0.7992    0.0000 O   0  0  0  0  0  0  0  0  0  0  0  0
    0.6319   -0.3867    0.0000 Na  0  0  0  0  0  0  0  0  0  0  0  0
    3.5109    0.0503    0.0000 O   0  0  0  0  0  0  0  0  0  0  0  0
    4.0942   -0.5331    0.0000 S   0  0  0  0  0  0  0  0  0  0  0  0
    4.6776    0.0503    0.0000 O   0  0  0  0  0  0  0  0  0  0  0  0
    3.5109   -1.1165    0.0000 O   0  0  0  0  0  0  0  0  0  0  0  0
    4.6776   -1.1165    0.0000 O   0  5  0  0  0  0  0  0  0  0  0  0
    0.4459    1.2496    0.0000 C   0  0  0  0  0  0  0  0  0  0  0  0
   -0.2686    0.8371    0.0000 O   0  0  0  0  0  0  0  0  0  0  0  0
    1.1604    0.8371    0.0000 O   0  0  0  0  0  0  0  0  0  0  0  0
    1.8749    1.2496    0.0000 Na  0  0  0  0  0  0  0  0  0  0  0  0
  1  2  1  0      
  2  3  1  0      
  3  4  1  0      
  4  5  1  0      
  5  6  1  0      
  6  1  1  0      
  1  7  1  0      
  7  8  1  0      
  8  9  1  0      
  9 10  1  0      
 10  2  1  0      
 11 12  1  0      
 12 13  1  0      
 13 14  1  0      
 14 15  1  0      
 15 16  1  0      
 16 11  1  0      
  5 17  1  0      
 17 12  1  0      
  9 18  1  0      
  3 19  1  0      
 13 20  1  0      
 14 21  1  0      
 15 22  1  0      
 23 24  1  0      
 24 25  1  0      
 25 26  1  0      
 26 27  1  0      
 27 28  1  0      
 28 23  1  0      
 25 22  1  0      
 27 29  1  0      
 29 30  1  0      
 23 31  1  0      
 31 32  1  0      
 32 33  1  0      
 33 34  1  0      
 34 24  1  0      
 33 35  1  0      
  9 36  1  0      
 36 37  2  0      
 36 38  1  0      
 38 39  1  0      
  4 40  1  0      
 40 41  1  0      
 41 42  2  0      
 41 43  2  0      
 41 44  1  0      
 44 45  1  0      
 11 46  1  0      
 46 47  2  0      
 46 48  1  0      
 48 49  1  0      
 26 50  1  0      
 50 51  1  0      
 51 52  2  0      
 51 53  2  0      
 51 54  1  0      
 33 55  1  0      
 55 56  2  0      
 55 57  1  0      
 57 58  1  0      
M  CHG  1  54  -1
M  STY  1   1 SUP
M  SLB  1   1   1
M  SAL   1  4  36  37  38  39
M  SBL   1  1  40
M  SMT   1 COONa
M  SBV   1 40   -8.5049    5.6172
M  STY  1   2 SUP
M  SLB  1   2   2
M  SAL   2  6  40  41  42  43  44  45
M  SBL   2  1  44
M  SMT   2 OSO3Na
M  SBV   2 44   -7.2204    4.2728
M  STY  1   3 SUP
M  SLB  1   3   3
M  SAL   3  4  46  47  48  49
M  SBL   3  1  50
M  SMT   3 COONa
M  SBV   3 50   -8.6157    6.3319
M  STY  1   4 SUP
M  SLB  1   4   4
M  SAL   4  5  50  51  52  53  54
M  SBL   4  1  54
M  SMT   4 OSO3-
M  SBV   4 54   -7.9892    5.8379
M  STY  1   5 SUP
M  SLB  1   5   5
M  SAL   5  4  55  56  57  58
M  SBL   5  1  59
M  SMT   5 COONa
M  SBV   5 59   -8.5052    5.6176
M  END
